# Supplementary material
Source: ML conference proceedings conference paper supplement (https://proceedings.mlr.press/v139/li21r.html)
Supplement: Supplementary file [file li21r-supp.pdf]

## A. Multimodal Unsupervised Image-to-image Translation (MUNIT) Framework

In this section, we give a brief description of the Multimodal Unsupervised Image-to-Image Translation (MUNIT) framework proposed by Huang et al. (2018).

MUNIT is based on a partially shared latent space assumption. It first assumes that the latent space of images can be decomposed into a content space and a style space. Then, it further assumes that images in different domains share a common content space but not the style space. In our context, the domains are different environmental types (e.g., sunny and rainy weather types) and the images are driving scenes. Therefore, the content space captures information that is shared by scenes of different environmental types, such as the shapes of roads and the roadside trees. The style space captures the variants of visual representation of the same content from different environmental types, for instance, the unique degrees of illumination, amounts of rain, and cloud patterns for the rainy weather type. Intuitively, the corresponding style space of an environmental type can be used to represent the environmental condition space of the environmental type.

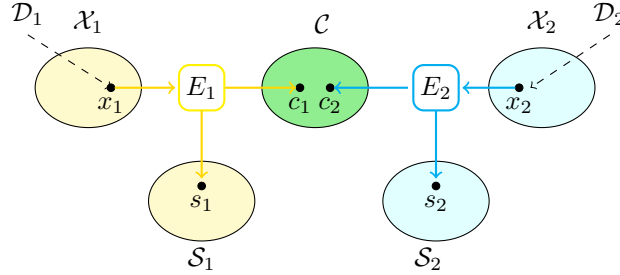

Figure 7. Structure of MUNIT. Images in each domain  $\mathcal{X}_i$  are encoded to a shared content space  $\mathcal{C}$  and a domain-specific style space  $\mathcal{S}_i$  through an encoder  $E_i$ . Each encoder has an inverse generator  $G_i$  omitted from this figure. For each domain  $\mathcal{X}_i$ , there is also a discriminator  $D_i$  which detect whether the image belong to  $\mathcal{X}_i$ .

Figure 7 presents the structure of MUNIT, where  $\mathcal{X}_1$  and  $\mathcal{X}_2$  denote two different domains (i.e., two different environmental types in our context). For each domain  $\mathcal{X}_i$ , there are an encoder  $E_i$  which projects the images from  $\mathcal{X}_i$  to a domain-invariant content space  $\mathcal{C}$  and a domain-specific style space  $\mathcal{S}_i$ , and a decoder  $G_i$  which reproduces images of  $\mathcal{X}_i$ . Furthermore,  $D_1$  and  $D_2$  are two discriminators that detect whether the image belongs to  $\mathcal{X}_1$  or  $\mathcal{X}_2$ , respectively. Specifically, these discriminators are expected to differentiate whether the input images are real or synthetic ones (i.e., images produced by a well-trained generator). All  $E_i$ ,  $G_i$ , and  $D_i$  in a MUNIT model are incarnated as deep neural networks, and learned by optimising the loss function that is consisting of the following costs:

- **Image Reconstruction Loss:** minimising the loss of image reconstruction for each  $\langle E_i, G_i \rangle$ , which encourages reconstruction in the direction: image  $\rightarrow$  latent  $\rightarrow$  image.
- **Latent Reconstruction Loss:** minimising the loss of latent code reconstruction for each  $\langle E_i, G_i \rangle$ , which encourages reconstruction in the direction: latent  $\rightarrow$  image  $\rightarrow$  latent.
- **GAN Loss:** achieving the equilibrium point in the minimax game for each  $\langle G_i, D_i \rangle$ , where  $D_i$  aims at distinguishing between synthetic images produced by  $G_i$  and real images in  $\mathcal{X}_i$ .

In general, the total loss is defined as:

$$\min_{E_1, E_2, G_1, G_2} \max_{D_1, D_2} \mathcal{L}_{\text{GAN}_1} + \mathcal{L}_{\text{GAN}_2} + \lambda_x (\mathcal{L}_{\text{recon}_1}^{\text{image}} + \mathcal{L}_{\text{recon}_2}^{\text{image}}) + \lambda_c (\mathcal{L}_{\text{recon}_1}^{\text{content}} + \mathcal{L}_{\text{recon}_2}^{\text{content}}) + \lambda_s (\mathcal{L}_{\text{recon}_1}^{\text{style}} + \mathcal{L}_{\text{recon}_2}^{\text{style}})$$

where  $\mathcal{L}_{\text{recon}_i}^{\text{image}}$  represents the image reconstruction loss for  $\langle E_i, G_i \rangle$ .  $\mathcal{L}_{\text{recon}_i}^{\text{content}}$  and  $\mathcal{L}_{\text{recon}_i}^{\text{style}}$  respectively represents the content code reconstruction loss and the style code reconstruction loss for  $\langle E_i, G_i \rangle$ .  $\mathcal{L}_{\text{GAN}_i}$  denotes the GAN loss for  $\langle G_i, D_i \rangle$ .  $\lambda_x$ ,  $\lambda_c$ ,  $\lambda_s$  are weights that control the importance of reconstruction terms.

Based on a well-trained MUNIT model, we can easily translate an image to another domain. For example, to translate an image  $x_1 \in \mathcal{X}_1$  to  $\mathcal{X}_2$ , the MUNIT model first decomposes it into a content latent code  $c_1$  and a style latent code  $s_1$  by

the encoder  $E_1$ , i.e.,  $(c_1, s_1) = E_1(x_1)$ . Then it uses the generator  $G_2$  to produce an image  $x_2$  by combining the content code  $c_1$  and a style latent code  $s_2$  sampled from the style space  $\mathcal{S}_2$  of  $\mathcal{X}_2$ , i.e.,  $x_2 = G_2(c_1, s_2)$ . By sampling different style latent code  $s_2$  from the style space  $\mathcal{S}_2$  of  $\mathcal{X}_2$ , multiple images with different appearances can be produced. For example, as shown in the left half of Figure 4, we can use one original driving scene to synthesise driving scenes under different environmental conditions of an environmental condition type. The original driving scene belongs to the sunny weather type. When transforming the original scene to the environmental type of 'Rain', we sampled two different style codes from the corresponding style space of the 'Rain' type. We can see that both synthesised driving scenes belong to the same environmental type but they have observable different degrees of light and amounts of rain. Besides this transformation, we can also use MUNIT to transform the entire set of driving scenes under different environmental conditions into those under the same environmental condition by using the same style code, as shown in the right half of Figure 4. We applied the same style code from the style space of the environmental type of 'Rain' on two different original driving scenes. It can be observed that the synthesised scenes are not only under the same environmental type, but also the same environmental condition by having similar degrees of light and amounts of rain.

## B. Details for Datasets and Target DNN-based ADSs

In this section, we present details about the subject DNN-based ADSs and datasets used in our experiments.

### B.1. Subject DNN-based ADSs

We focus on testing DNN-based ADSs that perform end-to-end steering angle control. Three popular pre-trained DNN-based ADSs that have been widely used in previous work (Pei et al., 2017; Tian et al., 2018; Zhang et al., 2018; Zhou et al., 2020), i.e., Dave-orig (Observer07, 2016), Dave-dropout (Navoshta, 2016), and Chauffeur (Emef, 2016), are selected as the subject systems. Dave-orig and Dave-dropout both use the CNN models base on the DAVE-2 self-driving architecture from NVIDIA (Bojarski et al., 2016). Chauffeur is one of the top-ranked DNN models in the Udacity self-driving car challenge (Udacity, 2016). It consists of one CNN model and one LSTM model. For an input driving scene, the CNN first extracts features from the input and then the LSTM predicts the steering angle of the input based on the concatenation of 100 features extracted by the CNN from the previous 100 consecutive driving scenes.

Table 4. Details of datasets

| DATASETS                                     | NUMBER | DURATION | ENV. TYPE       |
|----------------------------------------------|--------|----------|-----------------|
| UDACITY TRAINING                             | 33808  | -        | SUNSHINE        |
| UDACITY TESTING                              | 5614   | -        | SUNSHINE        |
| LOS ANGELES - NIGHT DRIVE (UTAH, 2019)       | 2000   | 1:17:03  | NIGHT           |
| DRIVING ON CALIFORNIA FREEWAY (TOURS, 2018)  | 1600   | 38:49    | SUNSHINE        |
| RAIN ON A CAR ROOF (VIDS, 2014)              | 1000   | 1:09:04  | RAIN            |
| DRIVING ON SNOW - GREENVILLE (MCGOWAN, 2018) | 1200   | 28:56    | SNOW IN DAYTIME |
| DRIVING IN THE SNOW (BADVBOYNOFEAR, 2018)    | 1200   | 1:04:53  | SNOW IN NIGHT   |

### B.2. Datasets

Table 4 presents the detailed information of all datasets used in our experiments. All three DNNs are trained on the Udacity dataset (Udacity, 2016), which is for the Udacity self-driving car challenge, containing 33808 training samples and 5614 testing samples. Each sample consists of a driving scene captured by a camera mounted behind the windshield of a driving car and the simultaneous steering angle issued by the human driver.

We study five environmental types (night, sunshine, rain, snow in daytime and snow in night) that are representatives of the runtime environments for DNN-based ADSs. The acquisition of the datasets used for training the MUNIT models is simple: we just searched videos longer than 20 minutes of driving in the five environmental types from YouTube, and conducted an automatic downsampling on the selected video to skip consecutive frames having similar contents and used the retained frames to construct the datasets. Table 4 shows the names of the videos and their links as in citations, the number of sampled frames, the duration of the videos, and the corresponding environmental types.

## C. Further Experimental Details

In this section, we present further experimental details as well as some in-depth analysis.

### C.1. Comparison with Baselines on Effectiveness

In order to evaluate the effectiveness of TACTIC, we compare TACTIC against two baseline methods, i.e., an approach using randomly sampled environmental conditions  $R_c$  and the state-of-the-art DeepRoad.

For TACTIC, we respectively execute TACTIC with two coverage-guiding strategies: KMNC (denoted as TACTIC<sup>KMNC</sup>) and NBC (denoted as TACTIC<sup>NBC</sup>) on each of the three subject DNN-based ADSs, under the five environmental types. In total, 30 experimental cases are executed (2 strategies  $\times$  5 environmental types  $\times$  3 systems). Furthermore, to reduce the randomness of (1+1) ES used in TACTIC, we conduct 10 runs for each case and average the results.

For  $R_c$ , for each subject DNN-based ADS, we randomly sample 4 style vectors (equal to the number of critical style vectors generated by TACTIC) for each of the environmental types. In total, 15 experimental cases are executed (5 environmental types  $\times$  3 systems). We also repeat  $R_c$  10 times for each experimental case and average the results.

For DeepRoad, we use the training datasets of the MUNIT models in TACTIC for training DeepRoad, and then generate driving scenes for each of the environmental types. Moreover, given the Udacity testing dataset, DeepRoad can only generate the same number (5614) of testing driving scenes as the Udacity dataset for each environmental type, since it transforms each driving scene into the other in a deterministic way. Therefore, for TACTIC, we apply just one critical style on the Udacity testing dataset each time and then average the results for a fair comparison.

Table 5. Average results of KMNC-guided TACTIC using (1+1) ES

| MODEL        | ENV. TYPE       | COVERAGE |        | NUMBER OF ERRORS |         |         |         |
|--------------|-----------------|----------|--------|------------------|---------|---------|---------|
|              |                 | KMNC     | NBC    | 10°              | 20°     | 30°     | 40°     |
| DAVE-ORIG    | NIGHT           | 69.12%   | 32.15% | 21277.6          | 19499.2 | 15505.3 | 8952.7  |
|              | SUNSHINE        | 52.81%   | 9.90%  | 5668.1           | 540.5   | 22.8    | 0.4     |
|              | RAIN            | 46.21%   | 4.88%  | 13482.0          | 7084.2  | 3058.4  | 809.3   |
|              | SNOW IN DAYTIME | 47.08%   | 3.65%  | 17938.7          | 6596.3  | 737.5   | 109.9   |
|              | SNOW IN NIGHT   | 72.95%   | 33.80% | 21415.2          | 19480.5 | 17721.2 | 13677.6 |
| DAVE-DROPOUT | NIGHT           | 51.55%   | 21.10% | 16547.8          | 4846.6  | 917.5   | 113.4   |
|              | SUNSHINE        | 38.54%   | 10.32% | 7031.0           | 793.5   | 30.0    | 0.2     |
|              | RAIN            | 40.07%   | 11.03% | 13334.3          | 4707.7  | 454.6   | 67.8    |
|              | SNOW IN DAYTIME | 39.82%   | 11.79% | 18828.0          | 17709.0 | 11744.8 | 1966.2  |
|              | SNOW IN NIGHT   | 33.06%   | 8.48%  | 21539.9          | 18721.5 | 4701.6  | 7.3     |
| CHAUFFEUR    | NIGHT           | 78.23%   | 38.03% | 1608.8           | 117.9   | 0.0     | 0.0     |
|              | SUNSHINE        | 69.41%   | 17.03% | 439.1            | 16.0    | 0.0     | 0.0     |
|              | RAIN            | 61.56%   | 8.02%  | 15342.6          | 8377.9  | 1507.3  | 0.8     |
|              | SNOW IN DAYTIME | 72.93%   | 20.23% | 19188.2          | 5275.1  | 145.9   | 0.5     |
|              | SNOW IN NIGHT   | 71.87%   | 24.62% | 9995.8           | 2040.4  | 25.8    | 0.0     |

**Comparison results with  $R_c$ .** Table 5 and Table 6 summarise the average results achieved by TACTIC<sup>KMNC</sup> and TACTIC<sup>NBC</sup> over 10 repeated runs for each experimental case, respectively. Table 7 summarises the average results achieved by TACTIC<sup>KMNC</sup> and TACTIC<sup>NBC</sup> over 10 repeated runs for each experimental case. In Table 5, Table 6, and Table 7, Column *Coverage* is the achieved test coverage and Column *Number of Errors* is the number of detected erroneous behaviours. From these results, we have the following findings:

In terms of the achieved coverage, TACTIC achieves higher coverage than  $R_c$  in most cases. For Dave-orig, Dave-dropout, and Chauffeur, TACTIC<sup>KMNC</sup> achieves on average 12.33%, 4.03%, and 5.87% higher coverage than  $R_c$ , respectively, and TACTIC<sup>NBC</sup> achieves on average 15.69%, 6.38%, and 7.42% higher coverage than  $R_c$ , respectively. In terms of the detected erroneous behaviours, TACTIC detects more erroneous behaviours than  $R_c$ . In total, for Dave-orig, Dave-dropout, and Chauffeur TACTIC<sup>KMNC</sup> detects on average 470.77%, 1495.11%, and 738.80% more erroneous behaviours than  $R_c$ , and TACTIC<sup>NBC</sup> detects on average 330.47%, 1171.31%, and 501.72% more erroneous behaviours than  $R_c$ . Furthermore, we also observe that, when the error bound increases,  $R_c$  hardly detects erroneous behaviours while TACTIC still shows a strong

Testing DNN-based ADSs under Critical Environmental Conditions

Table 6. Average results of NBC-guided TACTIC using (1+1) ES

| MODEL        | ENV. TYPE       | COVERAGE |        | NUMBER OF ERRORS |         |         |         |
|--------------|-----------------|----------|--------|------------------|---------|---------|---------|
|              |                 | KMNC     | NBC    | 10°              | 20°     | 30°     | 40°     |
| DAVE-ORIG    | NIGHT           | 73.68%   | 35.92% | 18675.1          | 13790   | 8627.7  | 4303.7  |
|              | SUNSHINE        | 56.24%   | 13.81% | 2629.8           | 196.5   | 22.7    | 0.7     |
|              | RAIN            | 50.71%   | 7.30%  | 9795.2           | 3479.7  | 1993.8  | 687.7   |
|              | SNOW IN DAYTIME | 54.41%   | 8.67%  | 13450.8          | 3396.8  | 845.1   | 209.5   |
|              | SNOW IN NIGHT   | 72.09%   | 33.30% | 20879.0          | 17978.1 | 14561.1 | 12074.7 |
| DAVE-DROPOUT | NIGHT           | 52.46%   | 22.09% | 11114.4          | 2967.8  | 463.2   | 22.7    |
|              | SUNSHINE        | 43.26%   | 16.12% | 1879.2           | 251.3   | 15.3    | 0.1     |
|              | RAIN            | 43.88%   | 13.75% | 12872.3          | 5872.6  | 583.7   | 79.5    |
|              | SNOW IN DAYTIME | 42.77%   | 13.92% | 17648.9          | 14779.5 | 8012.4  | 930.0   |
|              | SNOW IN NIGHT   | 33.47%   | 8.55%  | 20973.3          | 8882.6  | 1831.0  | 21.1    |
| CHAUFFEUR    | NIGHT           | 78.93%   | 39.92% | 2965.9           | 198.7   | 0.0     | 0.0     |
|              | SUNSHINE        | 69.85%   | 20.49% | 306.3            | 22.8    | 0.0     | 0.0     |
|              | RAIN            | 62.19%   | 11.21% | 12560.4          | 6627.6  | 915.5   | 3.4     |
|              | SNOW IN DAYTIME | 71.36%   | 23.90% | 12600.5          | 669.4   | 73.0    | 0.2     |
|              | SNOW IN NIGHT   | 72.61%   | 26.97% | 2955.5           | 240.2   | 12.8    | 0.0     |

ability to detect erroneous behaviours. For example, for Dave-dropout,  $R_c$  detects no erroneous behaviours when the error bound is set to 40° in the environmental type of “Snow in Daytime”, while  $TACTIC^{KMNC}$  and  $TACTIC^{NBC}$  still detect on average 1966.2 and 930 erroneous behaviours, respectively.

Following existing guidelines (Arcuri & Briand, 2014), to further investigate whether the differences between TACTIC and  $R_c$  are statistically significant, we use the nonparametric pairwise Mann-Whitney U test (Capon, 1991) and Vargha-Delaney Statistics  $\hat{A}_{12}$  (Vargha & Delaney, 2000), where for two approaches A and B, A has significantly better performance than B if  $\hat{A}_{12}$  is higher than 0.5 and the p-value is less than 0.05. The level of significance ( $\alpha$ ) is set to 0.05.

Table 8 reports the statistical test results comparing  $TACTIC^{KMNC}$  and  $R_c$ , while those for comparing  $TACTIC^{KMNC}$  and  $R_c$  are reported in Table 9. The results show that: (1) for the achieved test coverage, TACTIC obtains significantly higher coverage than  $R_c$  in 86.67% (26 out of 30) experimental cases ( $\hat{A}_{12}$  greater than 0.78 and p-value less than 0.01). For the other 4 cases, TACTIC also achieves comparable coverage to  $R_c$ , with an average of only 0.66% lower coverage than  $R_c$ . (2) for the number of detected erroneous behaviours, TACTIC detects significantly more erroneous behaviours than  $R_c$  for 91.67% (110 cases) of the 120 cases (4 error bounds and each bound has 30 experimental cases), by having  $\hat{A}_{12}$  greater than 0.75 and p-value less than 0.04. For the 10 exceptional cases where the significance is not observed, the numbers of erroneous behaviours detected by both TACTIC and  $R_c$  are not large enough to pass the significance tests, but in no case, TACTIC detects fewer erroneous behaviours than  $R_c$ .

In summary, we can conclude that TACTIC manages to detect more diverse and more serious erroneous behaviours than  $R_c$ .

**Comparison results with DeepRoad.** Table 10 presents the results achieved by DeepRoad. Table 11 and Table 12 present the average results achieved by  $TACTIC^{KMNC}$  and  $TACTIC^{NBC}$ , respectively. Recall that we separately apply each critical environmental condition produced by TACTIC and average the results to conduct a comparison with DeepRoad.

In terms of the detected erroneous behaviours, the comparison results are consistent with the results of comparing TACTIC with  $R_c$  that TACTIC always detects substantially more erroneous behaviours than DeepRoad on all three subject systems with the four error bounds. In total, for Dave-orig, Dave-dropout, and Chauffeur,  $TACTIC^{KMNC}$  detects on average 390.29%, 956.14%, and 514.88% more erroneous behaviours than DeepRoad, respectively, and  $TACTIC^{NBC}$  detects on average 341.92%, 931.90%, and 416.74% more erroneous behaviours than DeepRoad, respectively.

The comparison of the achieved coverage is more complex. For Dave-orig and Dave-dropout, TACTIC shows slightly higher coverage than DeepRoad, which, specifically, is that  $TACTIC^{KMNC}$  achieves on average 1.52% and 0.82% higher coverage, and  $TACTIC^{NBC}$  achieves on average 4.53% and 1.59% higher coverage than DeepRoad, respectively. For Chauffeur, the average coverage achieved by TACTIC is lower than DeepRoad, however, the difference is very small, which is an average of 0.71% between  $TACTIC^{KMNC}$  and DeepRoad, and 1.05% between  $TACTIC^{NBC}$  and DeepRoad.

Testing DNN-based ADSs under Critical Environmental Conditions

Table 7. Average results of Using Random Styles ( $R_c$ )

| MODEL        | ENV. TYPE       | COVERAGE |        | NUMBER OF ERRORS |        |       |      |
|--------------|-----------------|----------|--------|------------------|--------|-------|------|
|              |                 | KMNC     | NBC    | 10°              | 20°    | 30°   | 40°  |
| DAVE-ORIG    | NIGHT           | 43.55%   | 3.18%  | 2971.2           | 269.7  | 25.5  | 1.9  |
|              | SUNSHINE        | 43.34%   | 1.97%  | 1300.5           | 103.8  | 4.7   | 0.0  |
|              | RAIN            | 42.04%   | 2.00%  | 1484.5           | 44.9   | 0.1   | 0.0  |
|              | SNOW IN DAYTIME | 47.15%   | 3.88%  | 3605.2           | 197.7  | 10.6  | 0.8  |
|              | SNOW IN NIGHT   | 52.04%   | 10.10% | 7323.4           | 2583.0 | 749.7 | 72.5 |
| DAVE-DROPOUT | NIGHT           | 36.70%   | 8.90%  | 965.2            | 42.1   | 3.1   | 0.0  |
|              | SUNSHINE        | 39.62%   | 12.51% | 635.8            | 57.0   | 3.4   | 0.0  |
|              | RAIN            | 33.07%   | 8.18%  | 878.6            | 66.4   | 4.0   | 0.0  |
|              | SNOW IN DAYTIME | 37.83%   | 10.15% | 701.3            | 57.3   | 5.5   | 0.0  |
|              | SNOW IN NIGHT   | 31.68%   | 7.85%  | 2260.6           | 61.7   | 5.0   | 0.0  |
| CHAUFFEUR    | NIGHT           | 73.01%   | 20.21% | 345.1            | 18.3   | 0.0   | 0.0  |
|              | SUNSHINE        | 68.28%   | 13.99% | 294.5            | 11.2   | 0.0   | 0.0  |
|              | RAIN            | 62.16%   | 10.18% | 1048.2           | 163.2  | 0.0   | 0.0  |
|              | SNOW IN DAYTIME | 63.05%   | 8.10%  | 3126.7           | 178.9  | 7.1   | 0.1  |
|              | SNOW IN NIGHT   | 67.44%   | 16.77% | 665.8            | 6.4    | 0.0   | 0.0  |

The reason is that the environmental condition to transform each testing driving scene generated by DeepRoad is independent of each other, whereas TACTIC uses one critical style vector corresponding to the same environmental condition to transform all the driving scenes. Consequently, the driving scenes generated by DeepRoad are under independent environmental conditions, and therefore, may result in higher coverage in some cases. This is especially the case for Chauffeur, since its CNN is only used as a feature extractor (cf. Appendix B), rendering the test coverage of Chauffeur more sensitive to diverse environmental conditions. Nevertheless, it is more important to study the critical environmental conditions instead of the various random ones, since most environmental conditions can be well handled by these popular DNN-based ADSs, as confirmed by the experimental results.

### C.2. Ablation Study

To justify the selection of (1+1) ES in TACTIC, we implement a new version of TACTIC by replacing (1+1) ES with the random search (RS) and compare the effectiveness of the two versions. Except for the search algorithm, the other implementation and settings, e.g., the fitness function, are not changed. We denote TACTIC using RS with KMNC-guided as  $RS^{KMNC}$  and the one with NBC-guided as  $RS^{NBC}$  in the experiments. For each experimental case, we also conduct 10 runs and average the results to reduce the randomness of the random search.

Table 13 and Table 14 summarise the average results achieved by  $RS^{KMNC}$  and  $RS^{NBC}$  over 10 repeated runs for each experimental case, respectively. We discuss the comparison results from two aspects, i.e., the achieved test coverage and the number of detected erroneous behaviours. In terms of the achieved coverage, for Dave-orig, Dave-dropout, and Chauffeur,  $TACTIC^{KMNC}$  achieves on average 7.34%, 3.88%, and 4.35% higher coverage than  $RS^{KMNC}$ , respectively, and  $TACTIC^{NBC}$  achieves on average 9.98%, 4.21%, and 4.14% higher coverage than  $RS^{NBC}$ , respectively. In terms of the detected erroneous behaviours, in total,  $TACTIC^{KMNC}$  detects on average 105.73%, 428.12%, and 120.24% more erroneous behaviours than  $RS^{KMNC}$ , and  $TACTIC^{NBC}$  detects on average 62.98%, 619.51%, and 155.80% more erroneous behaviours than  $RS^{NBC}$  for Dave-orig, Dave-dropout, and Chauffeur, respectively. Additionally, we also find that the difference between the number of erroneous behaviours detected by the two approaches increases with the error bound. For example, when setting the error bound to 40°, for Dave-dropout,  $RS^{KMNC}$  and  $RS^{NBC}$  only respectively detect on average 0.1 and 0.2 erroneous behaviours in the environmental type of "Snow in Daytime", while  $TACTIC^{KMNC}$  and  $TACTIC^{NBC}$  respectively detect on average 1966.2 and 930 erroneous behaviours.

Furthermore, Table 15 and Table 16 respectively report the statistical test results comparing TACTIC using (1+1) ES and TACTIC using RS with two coverage-guiding strategies. From these tables, we can observe that: (1) In terms of the achieved coverage,  $TACTIC^{KMNC}$  achieves significantly higher coverage than  $RS^{KMNC}$  for 73.33% (11 cases) of the 15 cases, and

### Testing DNN-based ADSs under Critical Environmental Conditions

---

TACTIC<sup>NBC</sup> achieves significantly higher coverage than RS<sup>NBC</sup> for 80% (12 cases) of the 15 cases, by having  $\hat{A}_{12}$  greater than 0.7 and p-value less than 0.04. (2) In terms of the detected erroneous behaviours, TACTIC<sup>KMNC</sup> detects significantly more erroneous behaviours than RS<sup>KMNC</sup> for 91.67% (55 cases) of the 60 cases (4 error bounds and each bound has 15 experimental cases), and TACTIC<sup>NBC</sup> detects significantly more erroneous behaviours than RS<sup>NBC</sup> for 93.33% (56 cases) of the 60 cases, by having  $\hat{A}_{12}$  greater than 0.76 and p-value less than 0.02. For the few exceptional cases, both TACTIC using (1+1) ES and using RS detect few erroneous behaviours.

Therefore, we can conclude that the critical environmental conditions produced by TACTIC using (1+1)ES can achieve higher test coverage and detect more serious erroneous behaviours than those produced by TACTIC using RS.

Testing DNN-based ADSs under Critical Environmental Conditions

Table 8. Statistical test results for TACTIC<sup>KMNC</sup> and R<sub>c</sub>.

| MODEL        | METRIC | NIGHT   |                | SUNSHINE |                | RAIN    |                | SNOW IN DAYTIME |                | SNOW IN NIGHT |                |
|--------------|--------|---------|----------------|----------|----------------|---------|----------------|-----------------|----------------|---------------|----------------|
|              |        | P-VALUE | $\hat{A}_{12}$ | P-VALUE  | $\hat{A}_{12}$ | P-VALUE | $\hat{A}_{12}$ | P-VALUE         | $\hat{A}_{12}$ | P-VALUE       | $\hat{A}_{12}$ |
| DAVE-ORIG    | KMNC   | 0.00009 | 1              | 0.00009  | 1              | 0.00085 | 0.92           | 0.36667         | 0.45           | 0.00009       | 1              |
|              | NBC    | 0.00009 | 1              | 0.00008  | 1              | 0.00008 | 1              | 0.22433         | 0.395          | 0.00009       | 1              |
|              | 10°    | 0.00009 | 1              | 0.00009  | 1              | 0.00009 | 1              | 0.00009         | 1              | 0.00009       | 1              |
|              | 20°    | 0.00009 | 1              | 0.00009  | 1              | 0.00009 | 1              | 0.00009         | 1              | 0.00009       | 1              |
|              | 30°    | 0.00009 | 1              | 0.00008  | 1              | 0.00004 | 1              | 0.00008         | 1              | 0.00009       | 1              |
|              | 40°    | 0.00009 | 1              | 0.03879  | 0.65           | 0.00003 | 1              | 0.00005         | 1              | 0.00008       | 1              |
| DAVE-DROPOUT | KMNC   | 0.00009 | 1              | 0.07023  | 0.7            | 0.00009 | 1              | 0.00021         | 0.97           | 0.00009       | 1              |
|              | NBC    | 0.00009 | 1              | 0.10606  | 0.33           | 0.00008 | 1              | 0.00008         | 1              | 0.01835       | 0.78           |
|              | 10°    | 0.00009 | 1              | 0.00009  | 1              | 0.00009 | 1              | 0.00009         | 1              | 0.00009       | 1              |
|              | 20°    | 0.00009 | 1              | 0.00009  | 1              | 0.00009 | 1              | 0.00009         | 1              | 0.00009       | 1              |
|              | 30°    | 0.00008 | 1              | 0.00007  | 1              | 0.00005 | 1              | 0.00008         | 1              | 0.00008       | 1              |
|              | 40°    | 0.00003 | 1              | 0.18406  | 0.55           | 0.00003 | 1              | 0.00003         | 1              | 0.00746       | 0.75           |
| CHAUFFEUR    | KMNC   | 0.00009 | 1              | 0.00363  | 0.86           | 0.00008 | 0              | 0.00009         | 1              | 0.00009       | 1              |
|              | NBC    | 0.00009 | 1              | 0.00009  | 1              | 0.00009 | 0              | 0.00009         | 1              | 0.00009       | 1              |
|              | 10°    | 0.00009 | 1              | 0.00043  | 0.945          | 0.00009 | 1              | 0.00009         | 1              | 0.00009       | 1              |
|              | 20°    | 0.00008 | 1              | 0.00432  | 0.85           | 0.00009 | 1              | 0.00009         | 1              | 0.00009       | 1              |
|              | 30°    | FAILED  |                | FAILED   |                | 0.00003 | 1              | 0.00006         | 1              | 0.00003       | 1              |
|              | 40°    | FAILED  |                | FAILED   |                | 0.03893 | 0.65           | 0.31317         | 0.545          | FAILED        |                |

\* We highlight the cases where TACTIC<sup>KMNC</sup> is worse than R<sub>c</sub> with red.

\*\* FAILED represents that the number of erroneous behaviours detected by the two approaches are not large enough to pass the significance tests.

Table 9. Statistical test results for TACTIC<sup>NBC</sup> and R<sub>c</sub>.

| MODEL        | METRIC | NIGHT   |                | SUNSHINE |                | RAIN    |                | SNOW IN DAYTIME |                | SNOW IN NIGHT |                |
|--------------|--------|---------|----------------|----------|----------------|---------|----------------|-----------------|----------------|---------------|----------------|
|              |        | P-VALUE | $\hat{A}_{12}$ | P-VALUE  | $\hat{A}_{12}$ | P-VALUE | $\hat{A}_{12}$ | P-VALUE         | $\hat{A}_{12}$ | P-VALUE       | $\hat{A}_{12}$ |
| DAVE-ORIG    | KMNC   | 0.00009 | 1              | 0.00009  | 1              | 0.00009 | 1              | 0.00009         | 1              | 0.00009       | 1              |
|              | NBC    | 0.00009 | 1              | 0.00008  | 1              | 0.00008 | 1              | 0.00009         | 1              | 0.00009       | 1              |
|              | 10°    | 0.00009 | 1              | 0.00009  | 1              | 0.00009 | 1              | 0.00009         | 1              | 0.00009       | 1              |
|              | 20°    | 0.00009 | 1              | 0.00009  | 1              | 0.00009 | 1              | 0.00009         | 1              | 0.00009       | 1              |
|              | 30°    | 0.00009 | 1              | 0.00008  | 1              | 0.00004 | 1              | 0.00008         | 1              | 0.00009       | 1              |
|              | 40°    | 0.00006 | 1              | 0.01742  | 0.7            | 0.00003 | 1              | 0.00005         | 1              | 0.00009       | 1              |
| DAVE-DROPOUT | KMNC   | 0.00009 | 1              | 0.00009  | 1              | 0.00009 | 1              | 0.00016         | 0.98           | 0.00009       | 1              |
|              | NBC    | 0.00009 | 1              | 0.00008  | 1              | 0.00008 | 1              | 0.00009         | 1              | 0.00009       | 1              |
|              | 10°    | 0.00009 | 1              | 0.00009  | 1              | 0.00009 | 1              | 0.00009         | 1              | 0.00009       | 1              |
|              | 20°    | 0.00009 | 1              | 0.00054  | 1              | 0.00009 | 1              | 0.00009         | 1              | 0.00009       | 1              |
|              | 30°    | 0.00008 | 1              | 0.0088   | 0.815          | 0.00005 | 1              | 0.00008         | 1              | 0.00008       | 1              |
|              | 40°    | 0.00003 | 1              | 0.18406  | 0.55           | 0.00003 | 1              | 0.00003         | 1              | 0.00037       | 0.9            |
| CHAUFFEUR    | KMNC   | 0.00009 | 1              | 0.00021  | 0.97           | 0.41023 | 0.535          | 0.00009         | 1              | 0.00009       | 1              |
|              | NBC    | 0.00009 | 1              | 0.00008  | 1              | 0.10614 | 0.67           | 0.00009         | 1              | 0.00009       | 1              |
|              | 10°    | 0.00009 | 1              | 0.00009  | 1              | 0.00009 | 1              | 0.00009         | 1              | 0.00009       | 1              |
|              | 20°    | 0.00008 | 1              | 0.00054  | 1              | 0.00009 | 1              | 0.00009         | 1              | 0.00009       | 1              |
|              | 30°    | FAILED  |                | FAILED   |                | 0.00003 | 1              | 0.00006         | 1              | 0.00298       | 0.8            |
|              | 40°    | FAILED  |                | FAILED   |                | 0.00298 | 0.8            | 0.33505         | 0.54           | FAILED        |                |

\* We highlight the cases where TACTIC<sup>NBC</sup> is worse than R<sub>c</sub> with red.

\*\* FAILED represents that the number of erroneous behaviours detected by the two approaches are not large enough to pass the significance tests.



Testing DNN-based ADSs under Critical Environmental Conditions

Table 10. Results of DeepRoad

| MODEL        | ENV. TYPE       | COVERAGE |        | NUMBER OF ERRORS |      |     |     |
|--------------|-----------------|----------|--------|------------------|------|-----|-----|
|              |                 | KMNC     | NBC    | 10°              | 20°  | 30° | 40° |
| DAVE-ORIG    | NIGHT           | 40.99%   | 5.99%  | 613              | 114  | 33  | 9   |
|              | SUNSHINE        | 40.97%   | 2.05%  | 355              | 40   | 3   | 0   |
|              | RAIN            | 40.23%   | 2.05%  | 487              | 20   | 0   | 0   |
|              | SNOW IN DAYTIME | 45.21%   | 3.81%  | 1250             | 90   | 2   | 0   |
|              | SNOW IN NIGHT   | 55.66%   | 21.50% | 3189             | 1996 | 802 | 173 |
| DAVE-DROPOUT | NIGHT           | 33.06%   | 9.28%  | 402              | 29   | 1   | 0   |
|              | SUNSHINE        | 34.48%   | 10.31% | 201              | 16   | 1   | 0   |
|              | RAIN            | 31.97%   | 8.46%  | 241              | 21   | 1   | 0   |
|              | SNOW IN DAYTIME | 34.99%   | 10.24% | 182              | 13   | 1   | 0   |
|              | SNOW IN NIGHT   | 31.29%   | 8.81%  | 2324             | 62   | 1   | 0   |
| CHAUFFEUR    | NIGHT           | 69.19%   | 18.64% | 140              | 6    | 0   | 0   |
|              | SUNSHINE        | 65.08%   | 11.16% | 86               | 5    | 0   | 0   |
|              | RAIN            | 62.25%   | 11.30% | 232              | 35   | 0   | 0   |
|              | SNOW IN DAYTIME | 63.64%   | 9.55%  | 876              | 188  | 23  | 0   |
|              | SNOW IN NIGHT   | 68.17%   | 20.43% | 573              | 57   | 0   | 0   |

Table 11. Results of TACTIC<sup>KMNC</sup> comparing with DeepRoad

| MODEL        | ENV. TYPE       | COVERAGE |        | NUMBER OF ERRORS |        |        |        |
|--------------|-----------------|----------|--------|------------------|--------|--------|--------|
|              |                 | KMNC     | NBC    | 10°              | 20°    | 30°    | 40°    |
| DAVE-ORIG    | NIGHT           | 48.78%   | 13.41% | 5398.5           | 5013.3 | 4199.0 | 2704.5 |
|              | SUNSHINE        | 42.27%   | 4.23%  | 1812.5           | 182.0  | 7.3    | 0.0    |
|              | RAIN            | 41.75%   | 3.17%  | 2631.5           | 1330.8 | 389.3  | 85.5   |
|              | SNOW IN DAYTIME | 40.45%   | 2.29%  | 4404.0           | 1518.8 | 231.5  | 30.5   |
|              | SNOW IN NIGHT   | 55.05%   | 22.22% | 5342.5           | 4976.8 | 4492.5 | 3456.5 |
| DAVE-DROPOUT | NIGHT           | 36.58%   | 12.14% | 4418.5           | 1268.3 | 211.3  | 22.3   |
|              | SUNSHINE        | 34.35%   | 9.00%  | 1813.8           | 216.8  | 6.3    | 0.0    |
|              | RAIN            | 35.24%   | 9.51%  | 1751.0           | 393.5  | 53.0   | 6.5    |
|              | SNOW IN DAYTIME | 34.46%   | 9.51%  | 4221.3           | 3506.5 | 1803.8 | 243.5  |
|              | SNOW IN NIGHT   | 31.72%   | 8.63%  | 5421.8           | 4690.5 | 1106.0 | 1.8    |
| CHAUFFEUR    | NIGHT           | 69.05%   | 19.47% | 380.3            | 22.8   | 0.0    | 0.0    |
|              | SUNSHINE        | 64.94%   | 10.94% | 109.0            | 2.8    | 0.0    | 0.0    |
|              | RAIN            | 61.28%   | 7.53%  | 3887.5           | 2199.0 | 353.3  | 0.0    |
|              | SNOW IN DAYTIME | 65.37%   | 10.86% | 4865.3           | 1340.5 | 36.5   | 0.0    |
|              | SNOW IN NIGHT   | 66.65%   | 16.27% | 2550.0           | 569.3  | 8.5    | 0.0    |



Testing DNN-based ADSs under Critical Environmental Conditions

Table 12. Results of TACTIC<sup>NBC</sup> comparing with DeepRoad

| MODEL        | ENV. TYPE       | COVERAGE |        | NUMBER OF ERRORS |        |        |        |
|--------------|-----------------|----------|--------|------------------|--------|--------|--------|
|              |                 | KMNC     | NBC    | 10°              | 20°    | 30°    | 40°    |
| DAVE-ORIG    | NIGHT           | 54.59%   | 21.72% | 4885.0           | 3898.3 | 2662.5 | 1620.5 |
|              | SUNSHINE        | 45.37%   | 6.62%  | 708.8            | 41.5   | 4.8    | 0.0    |
|              | RAIN            | 40.71%   | 2.90%  | 3035.8           | 1422.5 | 816.5  | 304.5  |
|              | SNOW IN DAYTIME | 41.80%   | 3.34%  | 3708.0           | 820.5  | 154.3  | 47.3   |
|              | SNOW IN NIGHT   | 60.03%   | 26.64% | 5041.0           | 4418.0 | 3716.3 | 2843.0 |
| DAVE-DROPOUT | NIGHT           | 39.97%   | 14.89% | 2116.8           | 774.8  | 124.5  | 5.3    |
|              | SUNSHINE        | 33.93%   | 11.05% | 281.0            | 14.0   | 0.8    | 0.0    |
|              | RAIN            | 34.71%   | 9.61%  | 3796.5           | 1921.8 | 186.9  | 28.0   |
|              | SNOW IN DAYTIME | 35.57%   | 9.76%  | 4872.3           | 4122.5 | 2688.5 | 342.3  |
|              | SNOW IN NIGHT   | 30.54%   | 8.77%  | 5306.0           | 2433.5 | 580.0  | 11.3   |
| CHAUFFEUR    | NIGHT           | 68.25%   | 19.95% | 370.3            | 41.3   | 0.0    | 0.0    |
|              | SUNSHINE        | 64.80%   | 11.17% | 73.3             | 5.3    | 0.0    | 0.0    |
|              | RAIN            | 61.34%   | 7.65%  | 4146.8           | 2198.3 | 369.5  | 2.5    |
|              | SNOW IN DAYTIME | 63.76%   | 10.69% | 3042.3           | 160.5  | 16.8   | 0.0    |
|              | SNOW IN NIGHT   | 66.37%   | 14.97% | 569.4            | 59.5   | 3.2    | 0.0    |

Table 13. Average results of KMNC-guided TACTIC using Random Search

| MODEL        | ENV. TYPE       | COVERAGE |        | NUMBER OF ERRORS |         |         |        |
|--------------|-----------------|----------|--------|------------------|---------|---------|--------|
|              |                 | KMNC     | NBC    | 10°              | 20°     | 30°     | 40°    |
| DAVE-ORIG    | NIGHT           | 52.48%   | 10.24% | 15471.7          | 4710.5  | 411.7   | 0.0    |
|              | SUNSHINE        | 43.66%   | 2.26%  | 2364.9           | 142.6   | 9.4     | 0.1    |
|              | RAIN            | 42.55%   | 2.06%  | 3629.9           | 225.9   | 5.8     | 0.2    |
|              | SNOW IN DAYTIME | 50.48%   | 5.43%  | 10496.0          | 1232.4  | 48.1    | 0.8    |
|              | SNOW IN NIGHT   | 64.56%   | 25.42% | 19629.1          | 15729.0 | 10319.7 | 4325.2 |
| DAVE-DROPOUT | NIGHT           | 38.10%   | 9.58%  | 4907.7           | 328.6   | 36.4    | 0.0    |
|              | SUNSHINE        | 38.03%   | 10.92% | 1429.5           | 47.7    | 1.3     | 0.0    |
|              | RAIN            | 34.83%   | 8.58%  | 1599.1           | 135.6   | 11.0    | 0.2    |
|              | SNOW IN DAYTIME | 37.36%   | 9.99%  | 2180.0           | 209.6   | 12.0    | 0.1    |
|              | SNOW IN NIGHT   | 32.04%   | 8.50%  | 18887.9          | 4175.9  | 13.9    | 0.0    |
| CHAUFFEUR    | NIGHT           | 73.75%   | 22.29% | 1202.5           | 54.7    | 0.0     | 0.0    |
|              | SUNSHINE        | 68.83%   | 16.51% | 407.7            | 9.8     | 0.0     | 0.0    |
|              | RAIN            | 61.76%   | 8.64%  | 3616.4           | 309.5   | 0.0     | 0.0    |
|              | SNOW IN DAYTIME | 65.45%   | 9.99%  | 12976.1          | 600.0   | 1.6     | 0.0    |
|              | SNOW IN NIGHT   | 70.25%   | 20.99% | 3475.6           | 253.1   | 0.0     | 0.0    |

Testing DNN-based ADSs under Critical Environmental Conditions

Table 14. Average results of NBC-guided TACTIC using Random Search

| MODEL        | ENV. TYPE       | COVERAGE |        | NUMBER OF ERRORS |         |        |        |
|--------------|-----------------|----------|--------|------------------|---------|--------|--------|
|              |                 | KMNC     | NBC    | 10°              | 20°     | 30°    | 40°    |
| DAVE-ORIG    | NIGHT           | 53.09%   | 10.73% | 15833.3          | 4783.0  | 384.0  | 9.1    |
|              | SUNSHINE        | 45.48%   | 2.85%  | 1451.4           | 81.2    | 5.0    | 0.0    |
|              | RAIN            | 42.35%   | 2.00%  | 3633.9           | 188.1   | 3.8    | 0.0    |
|              | SNOW IN DAYTIME | 51.87%   | 6.80%  | 9730.0           | 748.8   | 20.0   | 14.3   |
|              | SNOW IN NIGHT   | 65.45%   | 25.69% | 19341.5          | 14917.3 | 9955.4 | 4966.7 |
| DAVE-DROPOUT | NIGHT           | 38.61%   | 10.51% | 4497.2           | 340.6   | 32.6   | 0.0    |
|              | SUNSHINE        | 42.56%   | 15.56% | 902.4            | 42.8    | 1.1    | 0.0    |
|              | RAIN            | 35.08%   | 8.94%  | 1056.7           | 86.2    | 1.7    | 0.0    |
|              | SNOW IN DAYTIME | 42.17%   | 13.86% | 975.5            | 111.0   | 9.9    | 0.2    |
|              | SNOW IN NIGHT   | 32.38%   | 8.51%  | 18267.9          | 4321.6  | 8.1    | 0.0    |
| CHAUFFEUR    | NIGHT           | 75.00%   | 27.53% | 691.8            | 32.1    | 0.0    | 0.0    |
|              | SUNSHINE        | 69.39%   | 18.39% | 296.3            | 15.2    | 0.0    | 0.0    |
|              | RAIN            | 62.29%   | 11.82% | 2397.7           | 232.7   | 0.0    | 0.0    |
|              | SNOW IN DAYTIME | 66.60%   | 10.99% | 12336.4          | 337.8   | 0.0    | 0.0    |
|              | SNOW IN NIGHT   | 70.40%   | 23.59% | 2461.3           | 137.2   | 0.0    | 0.0    |

Table 15. Statistical test results for TACTIC<sup>KMNC</sup> and RS<sup>KMNC</sup>.

| MODEL        | METRIC | NIGHT   |                | SUNSHINE |                | RAIN    |                | SNOW IN DAYTIME |                | SNOW IN NIGHT |                |
|--------------|--------|---------|----------------|----------|----------------|---------|----------------|-----------------|----------------|---------------|----------------|
|              |        | P-VALUE | $\hat{A}_{12}$ | P-VALUE  | $\hat{A}_{12}$ | P-VALUE | $\hat{A}_{12}$ | P-VALUE         | $\hat{A}_{12}$ | P-VALUE       | $\hat{A}_{12}$ |
| DAVE-ORIG    | KMNC   | 0.00009 | 1              | 0.00009  | 1              | 0.00455 | 0.85           | 0.00009         | 0              | 0.00009       | 1              |
|              | NBC    | 0.00009 | 1              | 0.00009  | 1              | 0.00007 | 1              | 0.00009         | 0              | 0.00009       | 1              |
|              | 10°    | 0.00009 | 1              | 0.00009  | 1              | 0.00009 | 1              | 0.00009         | 1              | 0.00009       | 1              |
|              | 20°    | 0.00009 | 1              | 0.00009  | 1              | 0.00009 | 1              | 0.00009         | 1              | 0.00009       | 1              |
|              | 30°    | 0.00009 | 1              | 0.00009  | 1              | 0.00009 | 1              | 0.00009         | 1              | 0.00009       | 1              |
|              | 40°    | 0.00009 | 1              | 0.13903  | 0.605          | 0.00004 | 1              | 0.00005         | 1              | 0.00009       | 1              |
| DAVE-DROPOUT | KMNC   | 0.00009 | 1              | 0.07923  | 0.7            | 0.00009 | 1              | 0.00454         | 0.85           | 0.00009       | 1              |
|              | NBC    | 0.00009 | 1              | 0.10606  | 0.33           | 0.00009 | 1              | 0.00009         | 1              | 0.42505       | 0.53           |
|              | 10°    | 0.00009 | 1              | 0.00009  | 1              | 0.00009 | 1              | 0.00009         | 1              | 0.00009       | 1              |
|              | 20°    | 0.00009 | 1              | 0.00008  | 1              | 0.00009 | 1              | 0.00009         | 1              | 0.00009       | 1              |
|              | 30°    | 0.00008 | 1              | 0.00007  | 1              | 0.00009 | 1              | 0.00009         | 1              | 0.00008       | 1              |
|              | 40°    | 0.00009 | 1              | 0.18406  | 0.55           | 0.00007 | 1              | 0.00009         | 1              | 0.00746       | 0.75           |
| CHAUFFEUR    | KMNC   | 0.00009 | 1              | 0.04808  | 0.725          | 0.00921 | 0.185          | 0.00009         | 1              | 0.0001        | 0.99           |
|              | NBC    | 0.00009 | 1              | 0.00256  | 0.875          | 0.00009 | 0              | 0.00009         | 1              | 0.00009       | 1              |
|              | 10°    | 0.00029 | 0.96           | 0.00628  | 0.835          | 0.00009 | 1              | 0.00009         | 1              | 0.00009       | 1              |
|              | 20°    | 0.00009 | 1              | 0.00008  | 0.92           | 0.00009 | 1              | 0.00009         | 1              | 0.00009       | 1              |
|              | 30°    | FAILED  |                | FAILED   |                | 0.00009 | 1              | 0.00009         | 1              | 0.00009       | 1              |
|              | 40°    | FAILED  |                | FAILED   |                | 0.03893 | 0.65           | 0.08403         | 0.6            | FAILED        |                |

\* We highlight the cases where TACTIC<sup>KMNC</sup> is worse than RS<sup>KMNC</sup> with red.

\*\* FAILED represents that the number of erroneous behaviours detected by the two approaches are not large enough to pass the significance tests.

Testing DNN-based ADSs under Critical Environmental Conditions

Table 16. Statistical test results for TACTIC<sup>NBC</sup> and RS<sup>NBC</sup>.

| MODEL        | METRIC | NIGHT   |                | SUNSHINE |                | RAIN    |                | SNOW IN DAYTIME |                | SNOW IN NIGHT |                |
|--------------|--------|---------|----------------|----------|----------------|---------|----------------|-----------------|----------------|---------------|----------------|
|              |        | P-VALUE | $\hat{A}_{12}$ | P-VALUE  | $\hat{A}_{12}$ | P-VALUE | $\hat{A}_{12}$ | P-VALUE         | $\hat{A}_{12}$ | P-VALUE       | $\hat{A}_{12}$ |
| DAVE-ORIG    | KMNC   | 0.00009 | 1              | 0.00009  | 1              | 0.00009 | 1              | 0.00021         | 0.97           | 0.00009       | 1              |
|              | NBC    | 0.00009 | 1              | 0.00008  | 1              | 0.00009 | 1              | 0.00009         | 1              | 0.00009       | 1              |
|              | 10°    | 0.00009 | 1              | 0.00009  | 1              | 0.00009 | 1              | 0.00009         | 1              | 0.00009       | 1              |
|              | 20°    | 0.00009 | 1              | 0.00009  | 1              | 0.00009 | 1              | 0.00009         | 1              | 0.00009       | 1              |
|              | 30°    | 0.00009 | 1              | 0.00008  | 1              | 0.00008 | 1              | 0.00009         | 1              | 0.00009       | 1              |
|              | 40°    | 0.00009 | 1              | 0.01742  | 0.7            | 0.00003 | 1              | 0.00009         | 1              | 0.00009       | 1              |
| DAVE-DROPOUT | KMNC   | 0.00009 | 1              | 0.14486  | 0.645          | 0.00009 | 1              | 0.23633         | 0.6            | 0.00009       | 1              |
|              | NBC    | 0.00009 | 1              | 0.00009  | 1              | 0.00009 | 1              | 0.33873         | 0.44           | 0.43989       | 0.525          |
|              | 10°    | 0.00009 | 1              | 0.00009  | 1              | 0.00009 | 1              | 0.00009         | 1              | 0.00009       | 1              |
|              | 20°    | 0.00009 | 1              | 0.00012  | 0.99           | 0.00009 | 1              | 0.00009         | 1              | 0.00009       | 1              |
|              | 30°    | 0.00008 | 1              | 0.00014  | 0.98           | 0.00007 | 1              | 0.00009         | 1              | 0.00008       | 1              |
|              | 40°    | 0.00003 | 1              | 0.18406  | 0.55           | 0.00004 | 1              | 0.00009         | 1              | 0.00037       | 0.9            |
| CHAUFFEUR    | KMNC   | 0.00009 | 1              | 0.00862  | 0.82           | 0.27252 | 0.415          | 0.00009         | 1              | 0.00009       | 1              |
|              | NBC    | 0.00009 | 1              | 0.00009  | 1              | 0.42504 | 0.53           | 0.00009         | 1              | 0.00009       | 1              |
|              | 10°    | 0.00009 | 1              | 0.02459  | 0.765          | 0.00009 | 1              | 0.00506         | 0.845          | 0.03201       | 0.75           |
|              | 20°    | 0.00009 | 1              | 0.00018  | 0.975          | 0.00009 | 1              | 0.00009         | 1              | 0.00009       | 1              |
|              | 30°    | FAILED  |                | FAILED   |                | 0.00003 | 1              | 0.00003         | 1              | 0.00298       | 0.8            |
|              | 40°    | FAILED  |                | FAILED   |                | 0.00298 | 0.8            | 0.08374         | 0.6            | FAILED        |                |

\* We highlight the cases where TACTIC<sup>NBC</sup> is worse than RS<sup>NBC</sup> with red.

\*\* FAILED represents that the number of erroneous behaviours detected by the two approaches are not large enough to pass the significance tests.
